# Supplementary material
Source: publisher figshare collection journal article supplement (https://acs.figshare.com/ndownloader/files/5088886)
Supplement: Supplementary file 1 [file 5088886]

data_global

_audit_creation_date               10-05-05


_publ_contact_author_name
;

Richard Welter

;
_publ_contact_author_address
;

Institut Le Bel, rue Blaise Pascal, 67000 STRASBOURG, FRANCE

;
_publ_contact_author_phone         '0390241593'
_publ_contact_author_fax           '0390241232'
_publ_contact_author_email          welter@chimie.u-strasbg.fr

_publ_requested_journal            'Organometallics'
_publ_contact_letter
;
;

_publ_requested_category            FM

_publ_section_title
; 

An aluminum complex supported by a fluorous diamino-dialkoxide ligand
for the highly productive ring opening polymerization of e-caprolactone

;

loop_
_publ_author_name
_publ_author_address

'AMGOUNE Abderramane'
;
 
Organometalliques et Catalyse, UMR 6509 CNRS-Universit\'e de Rennes 1
Institut de Chimie de Rennes, 35042 Rennes Cedex, France

;

'LAVANANT Laurent'
;
 
Organometalliques et Catalyse, UMR 6509 CNRS-Universit\'e de Rennes 1
Institut de Chimie de Rennes, 35042 Rennes Cedex, France

;

'THOMAS Christophe'
;
 
Organometalliques et Catalyse, UMR 6509 CNRS-Universit\'e de Rennes 1
Institut de Chimie de Rennes, 35042 Rennes Cedex, France

;


'CHI Yun'
;
 
Department of Chemistry, National Tsing Hua University
300, Hsinchu, Taiwan R.O.C.

;

'WELTER Richard'
;
 
 Laboratoire DECMET, UMR CNRS 7513
 Universit\'e Louis Pasteur
 4, rue Blaise Pascal 67000 STRASBOURG, France

;

'DAGORNE Samuel'
;
 
Chimie Organometallique, UMR 7576 CNRS-Ecole Nationale
Superieure de Chimie de Paris, 75231 Paris Cedex 05, France

;

'CARPENTIER Jean-Francois'
;
 
Organometalliques et Catalyse, UMR 6509 CNRS-Universit\'e de Rennes 1
Institut de Chimie de Rennes, 35042 Rennes Cedex, France

;

_publ_section_abstract
; ?
;

_publ_section_comment
; ?
;

_publ_section_exptl_prep
; ?
;


_publ_section_exptl_refinement
; ?
;


_publ_section_references
;

Burla, M.C., Camalli, M., Cascarano, G.,Giacovazzo, C., Polidori, G.,
Spagna, R. &Viterbo, D. (1989).  SIR.  J. Appl. Cryst. 22, 389-393.

A.L. Spek, PLATON 98, Utrecht University, The Netherland, 1998.

KappaCCD Operation Manual (1997), Nonius B.V., Delft, The Nederlands.

Otwinowski, Z. & Minor, W. (1997), Methods in Enzymology, 276, 307-326.

Sheldrick, G.M. (1997). SHELXL97. Program for the refinement
of crystal structures. University of Gottingen. Germany.

;

_publ_section_figure_captions
; ?
;

_publ_section_acknowledgements
; ?
;
 
data_Al_Oi_Pr
 
_audit_creation_method            SHELXL-97 
_chemical_name_systematic 
; 
 ? 
; 
_chemical_name_common             ? 
_chemical_melting_point           ? 
_chemical_formula_moiety          'C15 H21 Al F12 N2 O3' 
_chemical_formula_sum 
 'C15 H21 Al F12 N2 O3' 
_chemical_formula_weight          532.32 
 
loop_ 
 _atom_type_symbol 
 _atom_type_description 
 _atom_type_scat_dispersion_real 
 _atom_type_scat_dispersion_imag 
 _atom_type_scat_source 
 'Al'  'Al'   0.0645   0.0514 
 'International Tables Vol C Tables 4.2.6.8 and 6.1.1.4' 
 'F'  'F'   0.0171   0.0103 
 'International Tables Vol C Tables 4.2.6.8 and 6.1.1.4' 
 'O'  'O'   0.0106   0.0060 
 'International Tables Vol C Tables 4.2.6.8 and 6.1.1.4' 
 'N'  'N'   0.0061   0.0033 
 'International Tables Vol C Tables 4.2.6.8 and 6.1.1.4' 
 'C'  'C'   0.0033   0.0016 
 'International Tables Vol C Tables 4.2.6.8 and 6.1.1.4' 
 'H'  'H'   0.0000   0.0000 
 'International Tables Vol C Tables 4.2.6.8 and 6.1.1.4' 
 
_symmetry_cell_setting            'orthorhombic' 
_symmetry_space_group_name_H-M    'P b c a' 
_symmetry_space_group_name_Hall   '-P 2ac 2ab' 
 
loop_ 
 _symmetry_equiv_pos_as_xyz 
 'x, y, z' 
 '-x+1/2, -y, z+1/2' 
 '-x, y+1/2, -z+1/2' 
 'x+1/2, -y+1/2, -z' 
 '-x, -y, -z' 
 'x-1/2, y, -z-1/2' 
 'x, -y-1/2, z-1/2' 
 '-x-1/2, y-1/2, z' 
 
_cell_length_a                    13.352(2) 
_cell_length_b                    19.546(3) 
_cell_length_c                    16.723(2) 
_cell_angle_alpha                 90.00 
_cell_angle_beta                  90.00 
_cell_angle_gamma                 90.00 
_cell_volume                      4364.2(11) 
_cell_formula_units_Z             8 
_cell_measurement_temperature     173(2) 
_cell_measurement_reflns_used     23791
_cell_measurement_theta_min        0.998
_cell_measurement_theta_max        30.034
 
_exptl_crystal_description        'prism' 
_exptl_crystal_colour             'colorless' 
_exptl_crystal_size_max           0.08 
_exptl_crystal_size_mid           0.07 
_exptl_crystal_size_min           0.05 
_exptl_crystal_density_meas       ? 
_exptl_crystal_density_diffrn     1.620 
_exptl_crystal_density_method     'not measured' 
_exptl_crystal_F_000              2160 
_exptl_absorpt_coefficient_mu     0.214 
_exptl_absorpt_correction_type    none 
_exptl_absorpt_correction_T_min   ? 
_exptl_absorpt_correction_T_max   ? 
_exptl_absorpt_process_details    ? 
 
_exptl_special_details 
; 
 ? 
; 
 
_diffrn_ambient_temperature       173(2) 
_diffrn_radiation_wavelength      0.71073 
_diffrn_radiation_type            MoK\a 
_diffrn_radiation_source          'fine-focus sealed tube' 
_diffrn_radiation_monochromator   graphite 
_diffrn_measurement_device_type    KappaCCD
_diffrn_measurement_method         '\p scans'
_diffrn_detector_area_resol_mean  ? 
_diffrn_standards_number          ? 
_diffrn_standards_interval_count  ? 
_diffrn_standards_interval_time   ? 
_diffrn_standards_decay_%         ? 
_diffrn_reflns_number             8899 
_diffrn_reflns_av_R_equivalents   0.0421 
_diffrn_reflns_av_sigmaI/netI     0.1975 
_diffrn_reflns_limit_h_min        -16 
_diffrn_reflns_limit_h_max        16 
_diffrn_reflns_limit_k_min        -25 
_diffrn_reflns_limit_k_max        25 
_diffrn_reflns_limit_l_min        -21 
_diffrn_reflns_limit_l_max        21 
_diffrn_reflns_theta_min          2.41 
_diffrn_reflns_theta_max          27.50 
_reflns_number_total              4933 
_reflns_number_gt                 2722 
_reflns_threshold_expression      >2sigma(I) 
 
_computing_data_collection        'Collect (Nonius B.V., 1998)' 
_computing_cell_refinement        'Denzo (Nonius B.V., 1998)' 
_computing_data_reduction         'Denzo (Nonius B.V., 1998)'
_computing_structure_solution     'SHELXS-97 (Sheldrick, 1997)'
_computing_structure_refinement   'SHELXL-97 (Sheldrick, 1997)' 
_computing_molecular_graphics     'PLATON 98 (Spek, 1998)'
_computing_publication_material   'SHELXL-97 (Sheldrick, 1997)' 
 
_refine_special_details 
; 
 Refinement of F^2^ against ALL reflections.  The weighted R-factor wR and 
 goodness of fit S are based on F^2^, conventional R-factors R are based 
 on F, with F set to zero for negative F^2^. The threshold expression of 
 F^2^ > 2sigma(F^2^) is used only for calculating R-factors(gt) etc. and is 
 not relevant to the choice of reflections for refinement.  R-factors based 
 on F^2^ are statistically about twice as large as those based on F, and R- 
 factors based on ALL data will be even larger. 
; 
 
_refine_ls_structure_factor_coef  Fsqd  
_refine_ls_matrix_type            full 
_refine_ls_weighting_scheme       calc  
_refine_ls_weighting_details 
 'calc w=1/[\s^2^(Fo^2^)+(0.0800P)^2^+0.0000P] where P=(Fo^2^+2Fc^2^)/3' 
_atom_sites_solution_primary      direct 
_atom_sites_solution_secondary    difmap 
_atom_sites_solution_hydrogens    geom 
_refine_ls_hydrogen_treatment     constr 
_refine_ls_extinction_method      none 
_refine_ls_extinction_coef        ? 
_refine_ls_number_reflns          4933 
_refine_ls_number_parameters      298 
_refine_ls_number_restraints      0 
_refine_ls_R_factor_all           0.2346 
_refine_ls_R_factor_gt            0.0639 
_refine_ls_wR_factor_ref          0.1986 
_refine_ls_wR_factor_gt           0.1329 
_refine_ls_goodness_of_fit_ref    0.952 
_refine_ls_restrained_S_all       0.952 
_refine_ls_shift/su_max           0.001 
_refine_ls_shift/su_mean          0.000 
 
loop_ 
 _atom_site_label 
 _atom_site_type_symbol 
 _atom_site_fract_x 
 _atom_site_fract_y 
 _atom_site_fract_z 
 _atom_site_U_iso_or_equiv 
 _atom_site_adp_type 
 _atom_site_occupancy 
 _atom_site_symmetry_multiplicity 
 _atom_site_calc_flag 
 _atom_site_refinement_flags 
 _atom_site_disorder_assembly 
 _atom_site_disorder_group 
Al Al 0.59510(9) 0.15987(7) 0.69002(8) 0.0348(4) Uani 1 1 d . . . 
O2 O 0.64881(19) 0.10181(14) 0.76227(16) 0.0337(8) Uani 1 1 d . . . 
F5 F 0.7200(2) 0.10029(15) 0.91990(16) 0.0601(8) Uani 1 1 d . . . 
F2 F 0.7040(2) -0.01745(14) 0.84410(19) 0.0642(9) Uani 1 1 d . . . 
F1 F 0.5879(2) -0.03177(14) 0.7582(2) 0.0790(10) Uani 1 1 d . . . 
O3 O 0.6493(2) 0.23386(15) 0.73187(19) 0.0459(9) Uani 1 1 d . . . 
O1 O 0.6316(2) 0.12869(18) 0.59973(18) 0.0519(9) Uani 1 1 d . . . 
F4 F 0.6087(3) 0.17621(16) 0.89940(17) 0.0753(10) Uani 1 1 d . . . 
F6 F 0.5714(2) 0.08620(19) 0.96462(18) 0.0810(11) Uani 1 1 d . . . 
F3 F 0.5532(3) -0.03175(17) 0.8831(2) 0.0900(12) Uani 1 1 d . . . 
F8 F 0.7915(3) 0.3340(2) 0.7028(3) 0.1286(18) Uani 1 1 d . . . 
N2 N 0.4947(3) 0.23481(19) 0.6340(2) 0.0432(10) Uani 1 1 d . . . 
F12 F 0.6926(3) 0.33493(18) 0.8389(3) 0.1226(17) Uani 1 1 d . . . 
N1 N 0.4635(2) 0.12141(19) 0.7287(2) 0.0396(10) Uani 1 1 d . . . 
C11 C 0.6233(4) 0.1087(3) 0.9013(3) 0.0510(14) Uani 1 1 d . . . 
F9 F 0.6806(3) 0.3988(2) 0.6489(4) 0.167(3) Uani 1 1 d . . . 
C2 C 0.3896(3) 0.2147(3) 0.6523(3) 0.0473(14) Uani 1 1 d . . . 
H2A H 0.3634 0.1849 0.6093 0.057 Uiso 1 1 calc . . . 
H2B H 0.3468 0.2560 0.6553 0.057 Uiso 1 1 calc . . . 
C9 C 0.5923(3) 0.0756(2) 0.8221(3) 0.0416(12) Uani 1 1 d . . . 
C3 C 0.4299(4) 0.0663(3) 0.6729(4) 0.0629(16) Uani 1 1 d . . . 
H3A H 0.4831 0.0320 0.6675 0.094 Uiso 1 1 calc . . . 
H3B H 0.4153 0.0862 0.6204 0.094 Uiso 1 1 calc . . . 
H3C H 0.3694 0.0445 0.6942 0.094 Uiso 1 1 calc . . . 
F10 F 0.5844(3) 0.40229(19) 0.7869(3) 0.151(2) Uani 1 1 d . . . 
F7 F 0.7167(3) 0.3011(3) 0.5980(3) 0.1259(19) Uani 1 1 d . . . 
C8 C 0.4779(3) 0.0928(3) 0.8100(3) 0.0573(15) Uani 1 1 d . . . 
H8A H 0.4372 0.0508 0.8163 0.069 Uiso 1 1 calc . . . 
H8B H 0.4559 0.1264 0.8506 0.069 Uiso 1 1 calc . . . 
F11 F 0.5364(4) 0.3077(2) 0.8389(3) 0.1101(15) Uani 1 1 d . . . 
C10 C 0.6091(4) -0.0019(3) 0.8273(4) 0.0556(15) Uani 1 1 d . . . 
C12 C 0.5181(4) 0.3024(2) 0.6704(3) 0.0615(16) Uani 1 1 d . . . 
H12A H 0.4643 0.3153 0.7082 0.074 Uiso 1 1 calc . . . 
H12B H 0.5213 0.3377 0.6280 0.074 Uiso 1 1 calc . . . 
C15 C 0.6095(6) 0.3372(3) 0.7946(6) 0.090(2) Uani 1 1 d . . . 
C1 C 0.3867(3) 0.1771(3) 0.7309(3) 0.0494(14) Uani 1 1 d . . . 
H1A H 0.4014 0.2090 0.7754 0.059 Uiso 1 1 calc . . . 
H1B H 0.3194 0.1573 0.7396 0.059 Uiso 1 1 calc . . . 
C13 C 0.6204(4) 0.2996(3) 0.7157(4) 0.0639(17) Uani 1 1 d . . . 
C4 C 0.5065(4) 0.2382(3) 0.5461(4) 0.0690(17) Uani 1 1 d . . . 
H4A H 0.4622 0.2736 0.5245 0.103 Uiso 1 1 calc . . . 
H4B H 0.4889 0.1938 0.5226 0.103 Uiso 1 1 calc . . . 
H4C H 0.5761 0.2493 0.5330 0.103 Uiso 1 1 calc . . . 
C5 C 0.7057(5) 0.0798(4) 0.5780(3) 0.077(2) Uani 1 1 d . . . 
H5 H 0.7355 0.0601 0.6279 0.093 Uiso 1 1 calc . . . 
C14 C 0.7013(6) 0.3335(4) 0.6666(7) 0.108(3) Uani 1 1 d . . . 
C7 C 0.6567(6) 0.0227(4) 0.5310(5) 0.126(3) Uani 1 1 d . . . 
H7A H 0.6524 -0.0184 0.5644 0.189 Uiso 1 1 calc . . . 
H7B H 0.6968 0.0127 0.4833 0.189 Uiso 1 1 calc . . . 
H7C H 0.5893 0.0368 0.5148 0.189 Uiso 1 1 calc . . . 
C6 C 0.7866(4) 0.1158(5) 0.5320(4) 0.113(3) Uani 1 1 d . . . 
H6A H 0.7573 0.1384 0.4852 0.169 Uiso 1 1 calc . . . 
H6B H 0.8369 0.0825 0.5144 0.169 Uiso 1 1 calc . . . 
H6C H 0.8185 0.1502 0.5663 0.169 Uiso 1 1 calc . . . 
 
loop_ 
 _atom_site_aniso_label 
 _atom_site_aniso_U_11 
 _atom_site_aniso_U_22 
 _atom_site_aniso_U_33 
 _atom_site_aniso_U_23 
 _atom_site_aniso_U_13 
 _atom_site_aniso_U_12 
Al 0.0313(7) 0.0319(8) 0.0412(9) 0.0020(7) -0.0008(7) -0.0002(6) 
O2 0.0307(17) 0.0331(18) 0.0374(19) 0.0050(16) 0.0018(15) 0.0015(13) 
F5 0.0524(19) 0.068(2) 0.0600(19) -0.0043(17) -0.0058(15) -0.0017(15) 
F2 0.0552(19) 0.0353(17) 0.102(2) 0.0134(16) -0.0224(17) 0.0056(14) 
F1 0.096(3) 0.0348(19) 0.106(3) -0.003(2) -0.036(2) -0.0027(16) 
O3 0.0429(18) 0.0254(19) 0.069(2) 0.0021(17) -0.0205(17) 0.0008(15) 
O1 0.0469(19) 0.067(2) 0.042(2) -0.0036(18) 0.0005(17) 0.0170(18) 
F4 0.116(3) 0.059(2) 0.051(2) -0.0115(17) 0.0037(18) 0.0213(19) 
F6 0.069(2) 0.126(3) 0.049(2) 0.023(2) 0.0130(17) 0.002(2) 
F3 0.081(2) 0.073(3) 0.117(3) 0.056(2) 0.003(2) -0.0150(18) 
F8 0.075(2) 0.102(3) 0.208(5) 0.072(3) -0.070(3) -0.045(2) 
N2 0.043(2) 0.037(2) 0.049(3) 0.013(2) -0.010(2) 0.000(2) 
F12 0.126(3) 0.072(3) 0.170(4) -0.055(3) -0.103(3) 0.039(2) 
N1 0.030(2) 0.037(2) 0.052(3) 0.009(2) -0.0032(19) 0.0012(18) 
C11 0.059(4) 0.050(4) 0.044(4) 0.015(3) 0.010(3) 0.008(3) 
F9 0.124(3) 0.072(3) 0.305(7) 0.114(4) -0.097(4) -0.047(2) 
C2 0.030(3) 0.044(3) 0.067(4) -0.001(3) -0.009(3) 0.006(2) 
C9 0.037(3) 0.036(3) 0.052(3) 0.009(3) 0.003(3) 0.000(2) 
C3 0.051(3) 0.039(3) 0.099(5) 0.003(3) -0.019(3) -0.009(3) 
F10 0.155(4) 0.039(2) 0.258(6) -0.050(3) -0.115(4) 0.039(2) 
F7 0.072(3) 0.170(5) 0.135(4) 0.080(4) -0.007(3) -0.039(3) 
C8 0.040(3) 0.065(4) 0.066(4) 0.016(3) 0.008(3) -0.002(3) 
F11 0.123(4) 0.102(3) 0.106(3) -0.052(3) -0.039(3) 0.042(3) 
C10 0.055(4) 0.037(3) 0.074(4) 0.018(3) -0.001(3) 0.001(3) 
C12 0.063(4) 0.026(3) 0.095(5) 0.007(3) -0.029(3) 0.001(2) 
C15 0.089(5) 0.037(4) 0.142(7) -0.032(4) -0.060(6) 0.014(4) 
C1 0.035(3) 0.051(3) 0.062(4) 0.006(3) 0.002(3) 0.004(2) 
C13 0.062(4) 0.028(3) 0.102(5) 0.014(3) -0.032(4) -0.005(3) 
C4 0.060(4) 0.076(4) 0.071(4) 0.027(4) -0.010(3) 0.007(3) 
C5 0.069(4) 0.115(6) 0.048(4) -0.010(4) 0.004(3) 0.035(4) 
C14 0.081(6) 0.075(6) 0.168(9) 0.070(6) -0.049(7) -0.028(4) 
C7 0.152(7) 0.107(7) 0.120(7) -0.066(6) 0.016(6) 0.026(5) 
C6 0.063(4) 0.211(9) 0.065(4) -0.011(6) 0.001(4) 0.026(5) 
 
_geom_special_details 
; 
 All esds (except the esd in the dihedral angle between two l.s. planes) 
 are estimated using the full covariance matrix.  The cell esds are taken 
 into account individually in the estimation of esds in distances, angles 
 and torsion angles; correlations between esds in cell parameters are only 
 used when they are defined by crystal symmetry.  An approximate (isotropic) 
 treatment of cell esds is used for estimating esds involving l.s. planes. 
; 
 
loop_ 
 _geom_bond_atom_site_label_1 
 _geom_bond_atom_site_label_2 
 _geom_bond_distance 
 _geom_bond_site_symmetry_2 
 _geom_bond_publ_flag 
Al O1 1.699(3) . ? 
Al O3 1.762(3) . ? 
Al O2 1.806(3) . ? 
Al N1 2.017(4) . ? 
Al N2 2.196(4) . ? 
O2 C9 1.354(5) . ? 
F5 C11 1.337(5) . ? 
F2 C10 1.333(5) . ? 
F1 C10 1.326(6) . ? 
O3 C13 1.368(6) . ? 
O1 C5 1.424(6) . ? 
F4 C11 1.335(6) . ? 
F6 C11 1.340(5) . ? 
F3 C10 1.331(6) . ? 
F8 C14 1.348(8) . ? 
N2 C4 1.479(7) . ? 
N2 C2 1.489(6) . ? 
N2 C12 1.488(6) . ? 
F12 C15 1.335(7) . ? 
N1 C8 1.482(6) . ? 
N1 C3 1.494(6) . ? 
N1 C1 1.496(6) . ? 
C11 C9 1.532(7) . ? 
F9 C14 1.339(8) . ? 
C2 C1 1.506(7) . ? 
C2 H2A 0.9900 . ? 
C2 H2B 0.9900 . ? 
C9 C10 1.532(7) . ? 
C9 C8 1.577(6) . ? 
C3 H3A 0.9800 . ? 
C3 H3B 0.9800 . ? 
C3 H3C 0.9800 . ? 
F10 C15 1.322(7) . ? 
F7 C14 1.327(10) . ? 
C8 H8A 0.9900 . ? 
C8 H8B 0.9900 . ? 
F11 C15 1.354(8) . ? 
C12 C13 1.562(7) . ? 
C12 H12A 0.9900 . ? 
C12 H12B 0.9900 . ? 
C15 C13 1.518(9) . ? 
C1 H1A 0.9900 . ? 
C1 H1B 0.9900 . ? 
C13 C14 1.509(10) . ? 
C4 H4A 0.9800 . ? 
C4 H4B 0.9800 . ? 
C4 H4C 0.9800 . ? 
C5 C6 1.502(9) . ? 
C5 C7 1.514(10) . ? 
C5 H5 1.0000 . ? 
C7 H7A 0.9800 . ? 
C7 H7B 0.9800 . ? 
C7 H7C 0.9800 . ? 
C6 H6A 0.9800 . ? 
C6 H6B 0.9800 . ? 
C6 H6C 0.9800 . ? 
 
loop_ 
 _geom_angle_atom_site_label_1 
 _geom_angle_atom_site_label_2 
 _geom_angle_atom_site_label_3 
 _geom_angle 
 _geom_angle_site_symmetry_1 
 _geom_angle_site_symmetry_3 
 _geom_angle_publ_flag 
O1 Al O3 121.99(17) . . ? 
O1 Al O2 104.79(16) . . ? 
O3 Al O2 94.99(14) . . ? 
O1 Al N1 113.62(17) . . ? 
O3 Al N1 122.41(17) . . ? 
O2 Al N1 84.09(15) . . ? 
O1 Al N2 92.00(16) . . ? 
O3 Al N2 82.69(15) . . ? 
O2 Al N2 161.28(15) . . ? 
N1 Al N2 81.58(15) . . ? 
C9 O2 Al 120.7(3) . . ? 
C13 O3 Al 125.2(3) . . ? 
C5 O1 Al 131.8(3) . . ? 
C4 N2 C2 108.5(4) . . ? 
C4 N2 C12 110.2(4) . . ? 
C2 N2 C12 110.4(4) . . ? 
C4 N2 Al 112.9(3) . . ? 
C2 N2 Al 108.1(3) . . ? 
C12 N2 Al 106.8(3) . . ? 
C8 N1 C3 109.8(4) . . ? 
C8 N1 C1 109.9(4) . . ? 
C3 N1 C1 109.5(3) . . ? 
C8 N1 Al 108.8(3) . . ? 
C3 N1 Al 109.3(3) . . ? 
C1 N1 Al 109.5(3) . . ? 
F4 C11 F5 105.5(4) . . ? 
F4 C11 F6 105.5(4) . . ? 
F5 C11 F6 106.0(4) . . ? 
F4 C11 C9 111.0(4) . . ? 
F5 C11 C9 114.2(4) . . ? 
F6 C11 C9 113.9(5) . . ? 
N2 C2 C1 109.5(4) . . ? 
N2 C2 H2A 109.8 . . ? 
C1 C2 H2A 109.8 . . ? 
N2 C2 H2B 109.8 . . ? 
C1 C2 H2B 109.8 . . ? 
H2A C2 H2B 108.2 . . ? 
O2 C9 C11 109.1(4) . . ? 
O2 C9 C10 109.6(4) . . ? 
C11 C9 C10 109.1(4) . . ? 
O2 C9 C8 111.4(4) . . ? 
C11 C9 C8 106.4(4) . . ? 
C10 C9 C8 111.1(4) . . ? 
N1 C3 H3A 109.5 . . ? 
N1 C3 H3B 109.5 . . ? 
H3A C3 H3B 109.5 . . ? 
N1 C3 H3C 109.5 . . ? 
H3A C3 H3C 109.5 . . ? 
H3B C3 H3C 109.5 . . ? 
N1 C8 C9 108.9(4) . . ? 
N1 C8 H8A 109.9 . . ? 
C9 C8 H8A 109.9 . . ? 
N1 C8 H8B 109.9 . . ? 
C9 C8 H8B 109.9 . . ? 
H8A C8 H8B 108.3 . . ? 
F1 C10 F2 106.6(5) . . ? 
F1 C10 F3 107.4(5) . . ? 
F2 C10 F3 106.6(4) . . ? 
F1 C10 C9 110.7(4) . . ? 
F2 C10 C9 112.2(4) . . ? 
F3 C10 C9 113.1(5) . . ? 
N2 C12 C13 110.5(4) . . ? 
N2 C12 H12A 109.5 . . ? 
C13 C12 H12A 109.5 . . ? 
N2 C12 H12B 109.5 . . ? 
C13 C12 H12B 109.5 . . ? 
H12A C12 H12B 108.1 . . ? 
F10 C15 F12 107.3(5) . . ? 
F10 C15 F11 106.2(7) . . ? 
F12 C15 F11 106.4(7) . . ? 
F10 C15 C13 113.9(7) . . ? 
F12 C15 C13 112.7(6) . . ? 
F11 C15 C13 109.8(5) . . ? 
N1 C1 C2 108.4(4) . . ? 
N1 C1 H1A 110.0 . . ? 
C2 C1 H1A 110.0 . . ? 
N1 C1 H1B 110.0 . . ? 
C2 C1 H1B 110.0 . . ? 
H1A C1 H1B 108.4 . . ? 
O3 C13 C14 108.6(5) . . ? 
O3 C13 C15 108.0(5) . . ? 
C14 C13 C15 109.1(7) . . ? 
O3 C13 C12 112.1(4) . . ? 
C14 C13 C12 110.3(5) . . ? 
C15 C13 C12 108.7(5) . . ? 
N2 C4 H4A 109.5 . . ? 
N2 C4 H4B 109.5 . . ? 
H4A C4 H4B 109.5 . . ? 
N2 C4 H4C 109.5 . . ? 
H4A C4 H4C 109.5 . . ? 
H4B C4 H4C 109.5 . . ? 
O1 C5 C6 108.4(6) . . ? 
O1 C5 C7 109.1(5) . . ? 
C6 C5 C7 113.0(6) . . ? 
O1 C5 H5 108.8 . . ? 
C6 C5 H5 108.8 . . ? 
C7 C5 H5 108.8 . . ? 
F7 C14 F9 107.2(8) . . ? 
F7 C14 F8 104.7(8) . . ? 
F9 C14 F8 106.1(6) . . ? 
F7 C14 C13 111.8(7) . . ? 
F9 C14 C13 113.0(8) . . ? 
F8 C14 C13 113.5(7) . . ? 
C5 C7 H7A 109.5 . . ? 
C5 C7 H7B 109.5 . . ? 
H7A C7 H7B 109.5 . . ? 
C5 C7 H7C 109.5 . . ? 
H7A C7 H7C 109.5 . . ? 
H7B C7 H7C 109.5 . . ? 
C5 C6 H6A 109.5 . . ? 
C5 C6 H6B 109.5 . . ? 
H6A C6 H6B 109.5 . . ? 
C5 C6 H6C 109.5 . . ? 
H6A C6 H6C 109.5 . . ? 
H6B C6 H6C 109.5 . . ? 
 
_diffrn_measured_fraction_theta_max    0.985 
_diffrn_reflns_theta_full              27.50 
_diffrn_measured_fraction_theta_full   0.985 
_refine_diff_density_max    0.459 
_refine_diff_density_min   -0.271 
_refine_diff_density_rms    0.086 
